# Supplementary material
Source: publisher site journal article supplement (https://static.cambridge.org/content/id/urn:cambridge.org:id:article:S0016756818000869/resource/name/S0016756818000869supp002.xls)
Supplement: Supplementary file 1 [file S0016756818000869supp002.xls]

## Sheet: 14BB08-2
Supplementary Table 3 Lu-Hf isotopic compositions of zircons from the granitoids in the Bengbu area.
	176Yb/177Hf	2σ	176Lu/177Hf	2σ	176Hf/177Hf	2σ	207Pb/206Pb	176Hf/177Hf(t1)	epsilon(Hf)	1s	T(DM1)	1s	T(DM2)	1s
							Age (Ma)				(Ga)		(Ga)
14BB08-2-01	0.0016661	6.25e-05	5.97497e-05	1.99e-06	0.281337	9.19e-06	1847.22	0.281335	-9.7014	0.32165	2.61048	0.0122402	3.0923	0.0122402
14BB08-2-08	0.0182914	0.000426	0.000734531	1.07e-05	0.281455	9.58e-06	2175.62	0.281425	0.980343	0.3353	2.49601	0.0130159	2.68909	0.0130159
14BB08-2-09	0.00277107	5.91e-05	0.000106768	2.52e-06	0.281313	8.36e-06	1872.22	0.281309	-10.0561	0.2926	2.64601	0.0111411	3.13293	0.0111411
14BB08-2-10	0.00106556	2.25e-05	4.0568e-05	8.05e-07	0.281322	7.35e-06	1835.19	0.281321	-10.4834	0.25725	2.62918	0.00978141	3.13104	0.00978141
14BB08-2-12	0.0993579	0.0024	0.00281852	5.77e-05	0.281312	1.38e-05	2160.8	0.281196	-7.49288	0.483	2.84399	0.0197179	3.1953	0.0197179
14BB08-2-14	0.000986558	7.42e-06	3.32468e-05	3.54e-07	0.281508	7.88e-06	1839.2	0.281507	-3.78207	0.2758	2.38074	0.0105334	2.72321	0.0105334
14BB08-2-17	0.00630279	2.7e-05	0.000239775	1.4e-06	0.281302	8.16e-06	1838.89	0.281294	-11.3493	0.2856	2.66905	0.0109078	3.18676	0.0109078
14BB08-2-18	0.00196487	3.4e-05	7.27895e-05	1.35e-06	0.281327	7.35e-06	1839.2	0.281324	-10.269	0.25725	2.62521	0.00979036	3.12095	0.00979036
14BB08-2-24	0.0441907	0.00041	0.00148676	1.78e-05	0.281486	7.09e-06	2124.07	0.281426	-0.142124	0.24815	2.50231	0.00982829	2.71818	0.00982829
14BB08-2-29	0.000889002	1.49e-05	3.4436e-05	7.25e-07	0.281531	1.03e-05	1820.68	0.28153	-3.40178	0.3605	2.35059	0.013776	2.68568	0.013776
14BB08-2-30	0.00315515	8.27e-05	0.000117795	2.49e-06	0.281475	1.66e-05	1862.04	0.281471	-4.53027	0.581	2.42967	0.0222159	2.7866	0.0222159
14BB08-2-32	0.00121984	3.16e-05	4.50508e-05	1.56e-06	0.281461	9.46e-06	1861.42	0.281459	-4.96432	0.3311	2.4444	0.012634	2.81278	0.012634
14BB08-2-34	0.0203935	0.000277	0.00077077	1.32e-05	0.281485	1.22e-05	2131.79	0.281453	0.991058	0.427	2.45836	0.0166026	2.65466	0.0166026

## Sheet: 14BB35-1
	176Yb/177Hf	2σ	176Lu/177Hf	2σ	176Hf/177Hf	2σ	207Pb/206Pb	176Hf/177Hf(t1)	epsilon(Hf)	1s	T(DM2)	1s	Tc	1s
							Age (Ma)				(Ga)		(Ga)
14BB35-1-03	0.0201861	0.00043	0.000733217	1.11e-05	0.281075	8.98e-06	2804.63	0.281036	1.66616	0.3143	3.00952	0.0120841	3.133	0.0120841
14BB35-1-04	0.0178268	8.88e-05	0.000670447	3.43e-06	0.281082	9.09e-06	2842.9	0.281046	2.89933	0.31815	2.99551	0.0122149	3.0879	0.0122149
14BB35-1-06	0.0187539	0.000124	0.000758715	5.22e-06	0.281096	6.45e-06	2709.57	0.281057	0.209899	0.22575	2.98321	0.00868997	3.14784	0.00868997
14BB35-1-08	0.0139186	0.000156	0.000499393	2.46e-06	0.281092	7.95e-06	2701.54	0.281066	0.334088	0.27825	2.96978	0.0106401	3.13411	0.0106401
14BB35-1-14	0.00765678	7.55e-05	0.000283952	1.53e-06	0.281066	1.03e-05	2853.7	0.28105	3.30291	0.3605	2.98819	0.0137023	3.0718	0.0137023
14BB35-1-15	0.0130139	0.000136	0.000504933	5.15e-06	0.281066	1.03e-05	2701.85	0.28104	-0.572758	0.3605	3.0042	0.013778	3.18935	0.013778
14BB35-1-17	0.0284613	0.00054	0.000947281	1.06e-05	0.281098	8.96e-06	2840.43	0.281047	2.88008	0.3136	2.99525	0.0121293	3.08715	0.0121293
14BB35-1-18	0.0137529	0.00017	0.00048332	4.51e-06	0.281067	9.16e-06	2701.54	0.281042	-0.497398	0.3206	3.00093	0.012247	3.18454	0.012247
14BB35-1-22	0.0203168	0.000133	0.00076964	3.33e-06	0.28107	1.28e-05	2738.89	0.28103	-0.0749418	0.448	3.01922	0.0172373	3.18774	0.0172373
14BB35-1-23	0.0302561	0.000388	0.00104954	1.06e-05	0.281097	1.02e-05	2809.57	0.281041	1.94858	0.357	3.00472	0.0138431	3.11971	0.0138431
14BB35-1-24	0.0147386	0.000182	0.000570966	7.36e-06	0.28109	9.35e-06	2539.81	0.281062	-3.53022	0.32725	2.97739	0.0125355	3.24413	0.0125355
14BB35-1-25	0.0148051	0.000197	0.000574959	7.38e-06	0.281084	1.05e-05	2856.48	0.281052	3.44791	0.3675	2.98615	0.0140763	3.06517	0.0140763
14BB35-1-26	0.0177161	0.000156	0.000673814	4.51e-06	0.28109	9e-06	2857.4	0.281053	3.48646	0.315	2.98582	0.0120973	3.06355	0.0120973
14BB35-1-27	0.0231001	0.000281	0.000798658	5.48e-06	0.281069	9.02e-06	2858.32	0.281025	2.52033	0.3157	3.02364	0.0121558	3.12282	0.0121558
14BB35-1-28	0.0196994	0.000418	0.000687208	1.11e-05	0.281086	7.04e-06	2809.26	0.281049	2.23307	0.2464	2.99183	0.0094653	3.10222	0.0094653
14BB35-1-29	0.0130354	0.00015	0.000518323	5.11e-06	0.281095	8.73e-06	2705.55	0.281068	0.50116	0.30555	2.96707	0.0116903	3.12707	0.0116903
14BB35-1-31	0.0272744	0.000259	0.00101492	1.31e-05	0.281116	8.77e-06	2739.2	0.281063	1.09365	0.30695	2.97678	0.0118977	3.11713	0.0118977
14BB35-1-34	0.0156488	5.78e-05	0.000599241	2.72e-06	0.28109	7.87e-06	2758.95	0.281059	1.4077	0.27545	2.97929	0.010559	3.11334	0.010559
14BB35-1-35	0.0144754	0.000165	0.000568938	2.42e-06	0.281047	8.37e-06	2843.52	0.281016	1.87152	0.29295	3.03432	0.0112092	3.15065	0.0112092
14BB35-1-36	0.0228405	0.000329	0.000836571	1.02e-05	0.281085	7.75e-06	2816.36	0.28104	2.07576	0.27125	3.00462	0.0104587	3.11725	0.0104587
14BB35-1-41	0.0193858	0.0001	0.000689979	3.16e-06	0.281094	7.99e-06	2810.18	0.281057	2.54775	0.27965	2.98075	0.0107455	3.08386	0.0107455
14BB35-1-45	0.0152396	0.000401	0.000601799	1.38e-05	0.281131	1.63e-05	2816.66	0.281099	4.17411	0.5705	2.92457	0.0218908	2.99021	0.0218908
14BB35-1-46	0.0131543	0.000352	0.000489728	9.3e-06	0.281111	9.33e-06	2821.91	0.281084	3.7904	0.32655	2.94321	0.0124898	3.01757	0.0124898
14BB35-1-47	0.0102278	0.000115	0.000384586	5.83e-06	0.28109	7.91e-06	2703.39	0.28107	0.53061	0.27685	2.96319	0.0105559	3.12361	0.0105559
14BB35-1-48	0.00975507	4.75e-05	0.000373945	1.65e-06	0.281093	7.88e-06	2713.27	0.281074	0.890425	0.2758	2.95811	0.0105139	3.10941	0.0105139
14BB35-1-50	0.0186768	6.41e-05	0.000706614	2.44e-06	0.281098	8.91e-06	2825.61	0.28106	3.01254	0.31185	2.97651	0.0119888	3.06763	0.0119888
14BB35-1-54	0.0130193	0.000107	0.000522243	3.67e-06	0.28108	8.08e-06	2542.9	0.281054	-3.7423	0.2828	2.98746	0.010817	3.25937	0.010817
14BB35-1-55	0.00957977	5.32e-05	0.000405591	2.09e-06	0.281123	7.65e-06	2501.85	0.281104	-2.93645	0.26775	2.9207	0.0102227	3.17896	0.0102227
14BB35-1-57	0.0102905	0.000176	0.000374407	3.54e-06	0.281085	9.57e-06	2757.1	0.281065	1.58488	0.33495	2.96976	0.0127659	3.10116	0.0127659
14BB35-1-59	0.00931045	6e-05	0.000341956	6.47e-07	0.28108	7.9e-06	2701.85	0.281062	0.207256	0.2765	2.97369	0.0105287	3.14204	0.0105287

## Sheet: 14BB37-1
	176Yb/177Hf	2σ	176Lu/177Hf	2σ	176Hf/177Hf	2σ	207Pb/206Pb	176Hf/177Hf(t1)	epsilon(Hf)	1s	T(DM2)	1s	Tc	1s
							Age (Ma)				(Ga)		(Ga)
14BB37-1-02	0.0279136	0.00115	0.00102999	3.61e-05	0.28144	8.98e-06	2158.95	0.281397	-0.37179	0.3143	2.53637	0.012288	2.75909	0.012288
14BB37-1-05	0.0268	0.000172	0.000931993	7.55e-07	0.2814	8.9e-06	2120.37	0.281362	-2.51565	0.3115	2.58474	0.0121357	2.8607	0.0121357
14BB37-1-06	0.0233168	0.000191	0.000839216	7.01e-06	0.281463	1.01e-05	2157.72	0.281428	0.685829	0.3535	2.49286	0.0137613	2.69334	0.0137613
14BB37-1-09	0.0284381	0.000214	0.00103382	6.47e-06	0.281432	8.35e-06	2127.78	0.28139	-1.33904	0.29225	2.54702	0.0114249	2.79436	0.0114249
14BB37-1-10	0.0580375	0.00264	0.00176328	7.13e-05	0.281399	1.18e-05	2166.35	0.281326	-2.74599	0.413	2.64336	0.0164365	2.91	0.0164365
14BB37-1-11	0.0246002	0.000411	0.000877506	1.14e-05	0.281405	8.12e-06	2147.22	0.281369	-1.64743	0.2842	2.57372	0.0110585	2.82816	0.0110585
14BB37-1-12	0.0498359	0.000694	0.00172966	1.85e-05	0.281441	8.23e-06	2124.07	0.281372	-2.09342	0.28805	2.58138	0.011467	2.83768	0.011467
14BB37-1-13	0.0684358	0.000687	0.00243802	2.2e-05	0.281497	7.61e-06	2127.78	0.281399	-1.04921	0.26635	2.55173	0.0108181	2.77659	0.0108181
14BB37-1-14	0.0416131	0.000334	0.00146252	1.29e-05	0.281488	8.25e-06	2127.78	0.281429	0.0448193	0.28875	2.49794	0.0114296	2.70958	0.0114296
14BB37-1-15	0.0161764	0.000189	0.000648162	4.8e-06	0.281428	7.35e-06	2157.1	0.281401	-0.282287	0.25725	2.52757	0.00995767	2.75218	0.00995767
14BB37-1-16	0.0225123	6.69e-05	0.000826639	4.36e-06	0.281431	8.23e-06	2124.07	0.281397	-1.18057	0.28805	2.53548	0.0112011	2.78181	0.0112011
14BB37-1-20	0.00907219	0.000222	0.000460667	7.31e-06	0.281409	8.16e-06	2118.21	0.28139	-1.55485	0.2856	2.54071	0.0109976	2.80024	0.0109976
14BB37-1-21	0.0209943	6.8e-05	0.000778696	2.84e-06	0.281428	8.43e-06	2127.78	0.281397	-1.11775	0.29505	2.53573	0.0114586	2.78081	0.0114586
14BB37-1-22	0.0284407	9.17e-05	0.00102062	2.93e-06	0.281415	7.94e-06	2120.37	0.281374	-2.09547	0.2779	2.56967	0.0108556	2.83498	0.0108556
14BB37-1-23	0.0128507	0.00023	0.000484728	5.56e-06	0.281413	9.1e-06	2120.37	0.281393	-1.40201	0.3185	2.53703	0.012273	2.79253	0.012273
14BB37-1-26	0.0167183	0.000136	0.000634129	3.32e-06	0.28147	9.27e-06	2121.3	0.281444	0.433526	0.32445	2.46946	0.0125675	2.68077	0.0125675
14BB37-1-28	0.0173075	7.38e-05	0.000694881	2.65e-06	0.281423	8.13e-06	2120.37	0.281395	-1.32658	0.28455	2.53646	0.0110261	2.78791	0.0110261
14BB37-1-29	0.0227422	0.000251	0.000854595	3.49e-06	0.281409	8.83e-06	2121.3	0.281374	-2.0572	0.30905	2.56701	0.0120195	2.83335	0.0120195
14BB37-1-35	0.0218891	0.000127	0.000803018	4.51e-06	0.281436	7.94e-06	2131.48	0.281404	-0.778605	0.2779	2.52617	0.0108015	2.76288	0.0108015
14BB37-1-37	0.0540139	0.00138	0.00174097	4.24e-05	0.281363	9.69e-06	2121.3	0.281292	-4.97334	0.33915	2.69203	0.0134774	3.01161	0.0134774
14BB37-1-38	0.00907846	0.00019	0.000396323	6.38e-06	0.281405	9.21e-06	2121.91	0.281389	-1.53895	0.32235	2.54256	0.0123911	2.8021	0.0123911
14BB37-1-41	0.0185657	5.05e-05	0.000735885	1.71e-06	0.281438	7.95e-06	2127.78	0.281408	-0.707947	0.27825	2.5196	0.0107971	2.75571	0.0107971
14BB37-1-43	0.018601	8.84e-05	0.000703273	1.72e-06	0.281412	8.66e-06	2133.02	0.281383	-1.47449	0.3031	2.55302	0.0117438	2.80668	0.0117438
14BB37-1-44	0.0220805	0.000304	0.000797616	7.12e-06	0.281435	8.28e-06	2136.11	0.281402	-0.720785	0.2898	2.52786	0.011262	2.7629	0.011262
14BB37-1-46	0.0287992	9.93e-05	0.00101705	2e-06	0.281432	8.29e-06	2158.33	0.28139	-0.650941	0.29015	2.54645	0.0113379	2.7757	0.0113379
14BB37-1-47	0.0193316	0.000255	0.00070856	5.56e-06	0.281428	9.54e-06	2158.33	0.281398	-0.349927	0.3339	2.5318	0.012944	2.75727	0.012944
14BB37-1-48	0.0193711	8.53e-05	0.000691182	2.33e-06	0.281426	1.02e-05	2127.78	0.281398	-1.06649	0.357	2.53283	0.0138327	2.77767	0.0138327
14BB37-1-49	0.0607811	0.00045	0.00224964	1.21e-05	0.281501	7.16e-06	2121.3	0.281411	-0.767273	0.2506	2.5328	0.010129	2.75434	0.010129
14BB37-1-51	0.0382764	0.000309	0.00138837	4.69e-06	0.281432	7.71e-06	2134.87	0.281376	-1.70052	0.26985	2.57112	0.0106456	2.82192	0.0106456
14BB37-1-52	0.020676	0.000147	0.000747343	3.3e-06	0.281443	8.79e-06	2124.07	0.281413	-0.615447	0.30765	2.51301	0.011943	2.74719	0.011943
14BB37-1-53	0.0442124	0.0021	0.00140908	5.98e-05	0.281432	8.53e-06	2120.37	0.281375	-2.05531	0.29855	2.5728	0.0117839	2.83251	0.0117839
14BB37-1-54	0.0174515	5.98e-05	0.000678105	1.66e-06	0.281431	8.19e-06	2138.89	0.281404	-0.606656	0.28665	2.52465	0.011105	2.75804	0.011105
14BB37-1-55	0.029338	9.43e-05	0.00106243	7.37e-07	0.281456	9.92e-06	2135.49	0.281413	-0.352871	0.3472	2.51592	0.0135911	2.73988	0.0135911
14BB37-1-56	0.0273042	0.000538	0.000969246	1.69e-05	0.281406	8.83e-06	2127.78	0.281367	-2.18423	0.30905	2.57879	0.0120536	2.84609	0.0120536

## Sheet: 14BB40-1
	176Yb/177Hf	2σ	176Lu/177Hf	2σ	176Hf/177Hf	2σ	207Pb/206Pb	176Hf/177Hf(t1)	epsilon(Hf)	1s	T(DM2)	1s	Tc	1s
							Age (Ma)				(Ga)		(Ga)
14BB40-1-02	0.0186327	9.15e-05	0.000759683	4.68e-06	0.281293	7.63e-06	2546.6	0.281257	3.53529	0.26705	2.71705	0.010331	2.81959	0.010331
14BB40-1-03	0.0213319	0.000375	0.000865721	1.46e-05	0.281077	7.59e-06	2776.86	0.281031	0.838339	0.26565	3.01782	0.0102483	3.1617	0.0102483
14BB40-1-04	0.0170886	0.000132	0.000675336	6.05e-06	0.281081	8.78e-06	2764.82	0.281046	1.085	0.3073	2.99696	0.0117996	3.13745	0.0117996
14BB40-1-05	0.00894593	4.68e-05	0.00048366	3.41e-06	0.2813	7.8e-06	2553.39	0.281277	4.40571	0.273	2.68875	0.0104898	2.77176	0.0104898
14BB40-1-06	0.0100722	2.8e-05	0.000447758	1.27e-06	0.281047	9.41e-06	2772.53	0.281023	0.469439	0.32935	3.0253	0.0125637	3.18071	0.0125637
14BB40-1-07	0.0267247	0.000219	0.00112288	6.8e-06	0.281108	9.44e-06	2757.1	0.281048	1.00153	0.3304	2.99632	0.012839	3.13655	0.012839
14BB40-1-08	0.0190463	2.94e-05	0.000710698	8.35e-07	0.2813	8.02e-06	2320.07	0.281268	-1.26743	0.2807	2.70522	0.0108473	2.93772	0.0108473
14BB40-1-09	0.0158929	2.66e-05	0.000773758	2.19e-06	0.281037	8.85e-06	2786.11	0.280996	-0.187039	0.30975	3.06398	0.0119099	3.23096	0.0119099
14BB40-1-10	0.0419739	0.000319	0.00160311	9.18e-06	0.28123	8.13e-06	2346.3	0.281159	-4.55657	0.28455	2.86484	0.0112293	3.15822	0.0112293
14BB40-1-11	0.0152402	0.000192	0.000627563	7.12e-06	0.28126	9.41e-06	2547.22	0.281229	2.57206	0.32935	2.75352	0.0126877	2.87878	0.0126877
14BB40-1-12	0.0264371	0.000202	0.000994254	1.39e-06	0.281274	8.33e-06	2557.1	0.281226	2.67479	0.29155	2.76008	0.0113403	2.88017	0.0113403
14BB40-1-13	0.0148665	5.46e-05	0.000542587	2.49e-06	0.281014	8.95e-06	2736.11	0.280985	-1.72893	0.31325	3.07736	0.0119679	3.28578	0.0119679
14BB40-1-14	0.0157649	3.02e-05	0.000651902	1.44e-06	0.281253	8.89e-06	2558.95	0.281221	2.57166	0.31115	2.76375	0.0119921	2.88788	0.0119921
14BB40-1-15	0.015171	0.000242	0.000598979	5.88e-06	0.281031	9.45e-06	2736.11	0.281	-1.2006	0.33075	3.05798	0.0126599	3.25379	0.0126599
14BB40-1-17	0.020917	3.4e-05	0.000868083	3.24e-06	0.281031	8.36e-06	2904.63	0.280983	2.10988	0.2926	3.07928	0.0112756	3.18355	0.0112756
14BB40-1-19	0.0270828	0.000782	0.000963573	2.9e-05	0.281178	8.14e-06	2514.5	0.281131	-1.6627	0.2849	2.88914	0.011046	3.11127	0.011046
14BB40-1-20	0.0192485	0.000171	0.000777499	5.38e-06	0.28116	7.99e-06	2510.8	0.281123	-2.03294	0.27965	2.89818	0.010787	3.13093	0.010787
14BB40-1-21	0.015307	0.000101	0.00060388	5.23e-06	0.281074	8.06e-06	2739.82	0.281043	0.401122	0.2821	3.00084	0.0108108	3.1596	0.0108108
14BB40-1-23	0.0365019	0.000202	0.0013553	9.99e-06	0.281359	1.11e-05	2173.15	0.281303	-3.40964	0.3885	2.66964	0.0152839	2.95578	0.0152839
14BB40-1-24	0.0280126	8.37e-05	0.00108027	2.41e-06	0.281386	8.6e-06	2172.22	0.281341	-2.08061	0.301	2.61406	0.0117669	2.87385	0.0117669
14BB40-1-27	0.00899507	0.000137	0.000349921	4.58e-06	0.280921	7.91e-06	2753.71	0.280903	-4.26145	0.27685	3.18532	0.0105027	3.45246	0.0105027
14BB40-1-28	0.0240907	0.000116	0.000966828	3.57e-06	0.281326	9e-06	2505.55	0.281279	3.39839	0.315	2.688	0.0122599	2.79614	0.0122599
14BB40-1-29	0.0290825	0.000226	0.00101662	8.4e-06	0.281149	9.26e-06	2507.1	0.2811	-2.94659	0.3241	2.93239	0.0125734	3.1836	0.0125734
14BB40-1-30	0.0485025	0.000645	0.00155035	1.71e-05	0.280998	8.22e-06	2772.22	0.280916	-3.35966	0.2877	3.18034	0.0112708	3.41217	0.0112708
14BB40-1-34	0.0336099	0.000454	0.00119994	1.26e-05	0.281356	9.26e-06	2695.99	0.281294	8.33652	0.3241	2.66247	0.0126991	2.64293	0.0126991
14BB40-1-37	0.0200602	0.000213	0.000855899	6.24e-06	0.280569	1.3e-05	3523.77	0.280511	-0.224565	0.455	3.69879	0.0173258	3.80336	0.0173258
14BB40-1-38	0.0189524	0.000106	0.000665211	6.72e-06	0.281113	1.02e-05	2550.92	0.281081	-2.62343	0.357	2.9537	0.0137151	3.19762	0.0137151
14BB40-1-39	0.0332139	0.000289	0.00128434	1.07e-05	0.281432	1.39e-05	2176.86	0.281379	-0.618886	0.4865	2.56381	0.0191397	2.78798	0.0191397
14BB40-1-40	0.0176339	0.000141	0.00066354	5.33e-06	0.281018	8.45e-06	2838.89	0.280982	0.539856	0.29575	3.08104	0.0113348	3.2277	0.0113348
14BB40-1-42	0.00990454	7.85e-05	0.000355152	5.03e-06	0.281287	9.42e-06	2528.09	0.28127	3.59152	0.3297	2.69718	0.0126235	2.80181	0.0126235

## Sheet: 14BB41-1
	176Yb/177Hf	2σ	176Lu/177Hf	2σ	176Hf/177Hf	2σ	207Pb/206Pb	176Hf/177Hf(t1)	epsilon(Hf)	1s	T(DM2)	1s	Tc	1s
							Age (Ma)				(Ga)		(Ga)
14BB41-1-01	0.0148299	6.31e-05	0.000624804	3.68e-06	0.281394	9.14e-06	2517.59	0.281364	6.68197	0.3199	2.57193	0.0123646	2.60492	0.0123646
14BB41-1-02	0.0345155	0.000143	0.00119386	1.9e-06	0.280493	7.84e-06	3568.21	0.280411	-2.73864	0.2744	3.83318	0.010518	3.98769	0.010518
14BB41-1-03	0.00835801	8.87e-05	0.000345327	2.49e-06	0.281251	9.02e-06	2520.37	0.281234	2.14108	0.3157	2.74512	0.0120736	2.88427	0.0120736
14BB41-1-04	0.0137544	0.000164	0.000523038	2.35e-06	0.281287	8.59e-06	2542.28	0.281262	3.62594	0.30065	2.70884	0.0115598	2.81071	0.0115598
14BB41-1-05	0.025059	0.000197	0.00084137	8.58e-06	0.28054	8.32e-06	3410.8	0.280485	-3.80777	0.2912	3.73577	0.0110772	3.93013	0.0110772
14BB41-1-07	0.0136028	4.4e-05	0.000498135	1.15e-06	0.28107	8.4e-06	2509.26	0.281046	-4.8102	0.294	2.99859	0.0112359	3.29838	0.0112359
14BB41-1-09	0.0301811	0.000251	0.00105866	6.63e-06	0.281166	9.01e-06	2538.58	0.281114	-1.70314	0.31535	2.91221	0.0122523	3.13224	0.0122523
14BB41-1-10	0.0317717	0.000376	0.0012175	1.56e-05	0.28104	8.36e-06	2966.35	0.28097	3.09406	0.2926	3.09624	0.011378	3.17185	0.011378
14BB41-1-11	0.027775	8.66e-05	0.00109917	6.65e-06	0.28134	1.01e-05	2538.89	0.281286	4.41174	0.3535	2.67829	0.0138094	2.76015	0.0138094
14BB41-1-14	0.0190731	3.05e-05	0.000686216	9.44e-07	0.280461	7.98e-06	3547.23	0.280414	-3.11875	0.2793	3.82574	0.0105632	3.99415	0.0105632
14BB41-1-17	0.0325925	0.000221	0.00112813	4.86e-06	0.281211	9.3e-06	2524.99	0.281157	-0.521838	0.3255	2.85602	0.0126835	3.04998	0.0126835
14BB41-1-19	0.0158685	0.000206	0.000547514	4.42e-06	0.281191	8.13e-06	2516.36	0.281165	-0.430037	0.28455	2.84008	0.0109212	3.03774	0.0109212
14BB41-1-20	0.0238325	0.000388	0.000977921	1.12e-05	0.281232	8.35e-06	2521.3	0.281185	0.410398	0.29225	2.8159	0.0113508	2.9904	0.0113508
14BB41-1-22	0.0295287	0.000106	0.00109984	4.31e-06	0.281329	7.93e-06	2516.66	0.281276	3.54099	0.27755	2.6927	0.01084	2.79605	0.01084
14BB41-1-23	0.0149849	7.52e-05	0.000702892	3.92e-06	0.281325	8.34e-06	2532.41	0.281291	4.4187	0.2919	2.67099	0.0112849	2.75469	0.0112849
14BB41-1-24	0.0271073	9.07e-05	0.00110755	4.26e-06	0.28135	8.17e-06	2543.51	0.281296	4.87414	0.28595	2.66452	0.0111762	2.73552	0.0111762
14BB41-1-25	0.0249818	0.000112	0.000998828	5.09e-06	0.281058	8.82e-06	2901.85	0.281002	2.73137	0.3087	3.05387	0.0119432	3.14378	0.0119432
14BB41-1-26	0.008797	5.8e-05	0.00035412	2.26e-06	0.281051	8.82e-06	2524.38	0.281034	-4.89547	0.3087	3.01287	0.0117498	3.31513	0.0117498
14BB41-1-27	0.0160052	0.000122	0.000639599	8.11e-06	0.281121	9.28e-06	2736.11	0.281087	1.89417	0.3248	2.94154	0.0124726	3.06616	0.0124726
14BB41-1-28	0.0189	0.000218	0.000697335	5.19e-06	0.281083	1e-05	2734.88	0.281046	0.406427	0.35	2.99705	0.0134468	3.15546	0.0134468
14BB41-1-30	0.0268906	0.000347	0.000944517	1.41e-05	0.281318	8.64e-06	2512.65	0.281272	3.31806	0.3024	2.69705	0.0117605	2.80654	0.0117605

## Sheet: 14BB44-1
	176Yb/177Hf	2σ	176Lu/177Hf	2σ	176Hf/177Hf	2σ	207Pb/206Pb	176Hf/177Hf(t1)	epsilon(Hf)	1s	T(DM2)	1s	Tc	1s
							Age (Ma)				(Ga)		(Ga)
14BB44-1-01	0.0419732	0.000325	0.00159795	1.06e-05	0.281058	9.55e-06	2925.61	0.280968	2.06469	0.33425	3.10245	0.0131302	3.20254	0.0131302
14BB44-1-02	0.0348976	0.000281	0.00126444	1.02e-05	0.281045	9.34e-06	2924.07	0.280974	2.22609	0.3269	3.09336	0.0127283	3.19158	0.0127283
14BB44-1-03	0.0359454	0.000356	0.00128571	7.84e-06	0.28104	8.16e-06	2939.19	0.280967	2.34766	0.2856	3.10177	0.0111251	3.19594	0.0111251
14BB44-1-04	0.0432529	0.000459	0.00146513	1.07e-05	0.28106	8.69e-06	2920.68	0.280978	2.302	0.30415	3.08845	0.0119081	3.18436	0.0119081
14BB44-1-05	0.0419857	0.000698	0.00153329	1.51e-05	0.281057	9.19e-06	2932.4	0.280971	2.32333	0.32165	3.09798	0.0126142	3.19216	0.0126142
14BB44-1-06	0.0473931	0.000295	0.00176793	8.87e-06	0.281088	1.17e-05	2931.48	0.280989	2.94409	0.4095	3.07416	0.0161689	3.15388	0.0161689
14BB44-1-07	0.0311782	0.000305	0.00120623	6.59e-06	0.281075	9.86e-06	2924.99	0.281007	3.43449	0.3451	3.04768	0.0134273	3.11916	0.0134273
14BB44-1-08	0.0284068	0.000156	0.00103313	5.13e-06	0.281023	8.91e-06	2934.87	0.280965	2.173	0.31185	3.10361	0.0120649	3.20316	0.0120649
14BB44-1-10	0.032347	0.000357	0.00117059	1.03e-05	0.281052	7.83e-06	2916.97	0.280987	2.52086	0.27405	3.07559	0.0106474	3.16824	0.0106474
14BB44-1-11	0.0331317	0.000416	0.00117626	8.04e-06	0.281058	9.56e-06	2937.96	0.280992	3.1946	0.3346	3.06788	0.0130034	3.14374	0.0130034
14BB44-1-12	0.0189745	0.00011	0.000741206	3.73e-06	0.281057	7.72e-06	2927.78	0.281015	3.78159	0.2702	3.03544	0.0103859	3.10029	0.0103859
14BB44-1-14	0.0312117	0.000447	0.00115747	8.32e-06	0.281111	8e-06	2946.29	0.281045	5.29215	0.28	2.99481	0.0108911	3.02317	0.0108911
14BB44-1-15	0.0305265	0.00023	0.00118233	5.71e-06	0.281045	7.95e-06	2920.37	0.280979	2.33533	0.27825	3.08564	0.0108119	3.1821	0.0108119
14BB44-1-16	0.0368388	0.000105	0.00128442	3.63e-06	0.281068	7.92e-06	2923.76	0.280996	3.02653	0.2772	3.06252	0.0108054	3.1429	0.0108054
14BB44-1-17	0.0297602	0.000331	0.00116621	1.18e-05	0.281059	8.45e-06	2929.32	0.280993	3.0491	0.29575	3.06599	0.0114911	3.14585	0.0114911
14BB44-1-19	0.0426006	0.000329	0.00154692	1.13e-05	0.281041	8.8e-06	2910.8	0.280955	1.24695	0.308	3.12106	0.0120782	3.24053	0.0120782
14BB44-1-20	0.0444671	0.000162	0.00167158	8.98e-06	0.281081	8.88e-06	2920.37	0.280987	2.62772	0.3108	3.07652	0.0122395	3.16441	0.0122395
14BB44-1-21	0.0325995	0.000231	0.00129067	6.42e-06	0.281064	7.68e-06	2937.96	0.280992	3.18238	0.2688	3.06875	0.0104786	3.14448	0.0104786
14BB44-1-22	0.0312487	0.000268	0.00133015	1.44e-05	0.281081	9.14e-06	2942.9	0.281005	3.79396	0.3199	3.04966	0.0124881	3.1113	0.0124881
14BB44-1-24	0.0299152	0.000139	0.00108223	6.77e-06	0.281045	9.28e-06	2915.74	0.280984	2.40559	0.3248	3.07855	0.0125883	3.17426	0.0125883
14BB44-1-27	0.0359894	0.000297	0.00128763	8.29e-06	0.281089	1.1e-05	2931.17	0.281017	3.93711	0.385	3.03397	0.0150162	3.09352	0.0150162
14BB44-1-28	0.0421518	0.000275	0.00149378	9.66e-06	0.281052	8.08e-06	2938.89	0.280968	2.37563	0.2828	3.10134	0.0110782	3.19402	0.0110782
14BB44-1-29	0.039699	0.000516	0.00140942	7.12e-06	0.281051	7.97e-06	2934.87	0.280972	2.40901	0.27895	3.09625	0.0109035	3.18888	0.0109035

## Sheet: 14BB47-1
	176Yb/177Hf	2σ	176Lu/177Hf	2σ	176Hf/177Hf	2σ	207Pb/206Pb	176Hf/177Hf(t1)	epsilon(Hf)	1s	T(DM2)	1s	Tc	1s
							Age (Ma)				(Ga)		(Ga)
14BB47-1-01	0.0108375	0.000108	0.000433325	1.59e-06	0.28132	8.71e-06	2505.55	0.281299	4.09265	0.30485	2.65921	0.0117044	2.75377	0.0117044
14BB47-1-05	0.0133475	0.000113	0.000527831	2.62e-06	0.281314	8.56e-06	2510.18	0.281289	3.83433	0.2996	2.67336	0.0115286	2.77312	0.0115286
14BB47-1-07	0.0116589	5.01e-05	0.000448353	1.62e-06	0.281328	8.27e-06	2521.3	0.281307	4.72788	0.28945	2.64881	0.0111198	2.7272	0.0111198
14BB47-1-09	0.015619	8.95e-05	0.000607036	2.93e-06	0.281344	8.46e-06	2545.98	0.281315	5.58501	0.2961	2.63805	0.0114253	2.69403	0.0114253
14BB47-1-10	0.0083305	2.32e-05	0.000364498	8.28e-07	0.28132	7.65e-06	2542.28	0.281302	5.06633	0.26775	2.65384	0.0102626	2.72282	0.0102626
14BB47-1-12	0.0150587	7.46e-05	0.000633695	4.25e-06	0.281334	8.45e-06	2535.49	0.281303	4.92416	0.29575	2.65419	0.0114164	2.72623	0.0114164
14BB47-1-13	0.0148034	0.000123	0.00060305	2.01e-06	0.281328	9.18e-06	2553.39	0.281298	5.1696	0.3213	2.66019	0.0123911	2.72515	0.0123911
14BB47-1-14	0.0173153	8.43e-05	0.000657335	7.11e-06	0.281324	8.52e-06	2524.07	0.281293	4.29771	0.2982	2.66825	0.0115152	2.75561	0.0115152
14BB47-1-15	0.0135676	0.000133	0.000534634	2.84e-06	0.281326	9.61e-06	2549.69	0.2813	5.14725	0.33635	2.65766	0.0129486	2.72364	0.0129486
14BB47-1-17	0.0164753	0.00015	0.00064743	3.12e-06	0.281346	8.18e-06	2556.48	0.281314	5.80285	0.2863	2.63891	0.0110588	2.68889	0.0110588
14BB47-1-18	0.0160657	0.000124	0.000662394	6.59e-06	0.28134	8.48e-06	2554.01	0.281308	5.53952	0.2968	2.64683	0.0114672	2.70305	0.0114672
14BB47-1-20	0.0145001	0.000163	0.00055796	4.99e-06	0.28134	7.95e-06	2538.89	0.281313	5.37356	0.27825	2.63984	0.0107223	2.70143	0.0107223
14BB47-1-21	0.0131915	0.000107	0.000516032	1.92e-06	0.281326	8.34e-06	2531.48	0.281301	4.7582	0.2919	2.65665	0.0112323	2.73325	0.0112323
14BB47-1-22	0.0172599	0.000189	0.000664028	7.41e-06	0.281338	8.25e-06	2510.8	0.281306	4.46608	0.28875	2.65046	0.011156	2.73504	0.011156
14BB47-1-27	0.0171381	0.000236	0.000662892	2.85e-06	0.28134	9.11e-06	2508.95	0.281308	4.49018	0.31885	2.64795	0.012319	2.73213	0.012319
14BB47-1-28	0.0138173	0.00016	0.000567104	3.23e-06	0.281346	9.25e-06	2514.5	0.281319	5.01404	0.32375	2.6325	0.0124802	2.70445	0.0124802
14BB47-1-30	0.0142419	0.000123	0.000586336	3.98e-06	0.281356	7.67e-06	2505.55	0.281328	5.13397	0.26845	2.6203	0.0103562	2.69018	0.0103562
14BB47-1-31	0.0154979	0.000246	0.000612833	6.7e-06	0.281347	7.68e-06	2510.8	0.281318	4.88056	0.2688	2.63453	0.0103743	2.70973	0.0103743
14BB47-1-33	0.0124997	0.000105	0.000471519	4.46e-06	0.281326	8.23e-06	2510.8	0.281304	4.39242	0.28805	2.65254	0.011072	2.73953	0.011072
14BB47-1-35	0.0111242	0.000101	0.000438768	1.73e-06	0.281363	8.03e-06	2509.26	0.281341	5.69349	0.28105	2.60189	0.0108038	2.65887	0.0108038
14BB47-1-36	0.013992	0.000107	0.000579143	1.76e-06	0.281341	8.33e-06	2505.55	0.281314	4.61631	0.29155	2.63993	0.0112411	2.7218	0.0112411
14BB47-1-37	0.017099	0.000304	0.000634434	9.16e-06	0.281335	8.7e-06	2516.66	0.281305	4.54978	0.3045	2.65222	0.0117548	2.73448	0.0117548
14BB47-1-41*	0.0157899	0.000196	0.000630037	5.36e-06	0.281338	9.78e-06	2516.66	0.281307	4.65332	0.3423	2.64827	0.0132133	2.72816	0.0132133
14BB47-1-42*	0.0180639	0.00034	0.000700434	1.65e-05	0.281394	9.84e-06	2524.07	0.28136	6.69918	0.3444	2.57696	0.0133369	2.60892	0.0133369
14BB47-1-43*	0.0118291	3.52e-05	0.000508986	1.83e-06	0.281346	9.22e-06	2508.34	0.281322	4.98379	0.3227	2.62815	0.0124216	2.70151	0.0124216
14BB47-1-52*	0.00892965	9.03e-05	0.000366813	5.32e-06	0.281381	8.24e-06	2513.27	0.281363	6.55138	0.2884	2.57276	0.0110714	2.60954	0.0110714
14BB47-1-53*	0.0102112	0.00014	0.000439398	3.72e-06	0.28132	7.83e-06	2505.24	0.281299	4.10015	0.27405	2.65868	0.0105238	2.75307	0.0105238
*metamorphic rims

## Sheet: 14BB49-1
	176Yb/177Hf	2σ	176Lu/177Hf	2σ	176Hf/177Hf	2σ	207Pb/206Pb	176Hf/177Hf(t1)	epsilon(Hf)	1s	T(DM2)	1s	Tc	1s
							Age (Ma)				(Ga)		(Ga)
14BB49-1-01	0.0123514	0.000199	0.000418485	3.73e-06	0.281403	7.97e-06	2524.99	0.281383	7.52014	0.27895	2.5463	0.0107285	2.55943	0.0107285
14BB49-1-02	0.00819242	8.05e-05	0.000286063	1.7e-06	0.281376	6.95e-06	2524.38	0.281362	6.77999	0.24325	2.57361	0.00931835	2.60421	0.00931835
14BB49-1-03	0.00929617	8.35e-05	0.000318124	1.61e-06	0.281389	7.08e-06	2518.21	0.281374	7.04622	0.2478	2.55828	0.00950335	2.58313	0.00950335
14BB49-1-09	0.00694374	6.87e-05	0.000232722	5.46e-07	0.281359	8.94e-06	2527.47	0.281348	6.33058	0.3129	2.59313	0.0119651	2.63409	0.0119651
14BB49-1-13	0.00731897	6.17e-05	0.0002503	1.22e-06	0.28137	7.52e-06	2510.18	0.281358	6.30255	0.2632	2.57929	0.010072	2.62236	0.010072
14BB49-1-16	0.0119391	7.01e-05	0.00044818	1.85e-06	0.2814	8.35e-06	2513.89	0.281379	7.12359	0.29225	2.55175	0.0112476	2.57503	0.0112476
14BB49-1-17	0.00842622	7.86e-05	0.000312911	1.86e-06	0.281393	8.2e-06	2502.16	0.281378	6.83025	0.287	2.55257	0.0110062	2.58384	0.0110062
14BB49-1-22	0.0363358	0.000585	0.00144083	2.36e-05	0.281434	8.93e-06	2524.07	0.281364	6.84547	0.31255	2.57233	0.0123471	2.59997	0.0123471
14BB49-1-24	0.00705981	0.000112	0.000235973	2.77e-06	0.281347	7.39e-06	2505.55	0.281336	5.40997	0.25865	2.60887	0.00988873	2.67331	0.00988873
14BB49-1-25	0.00756312	9.27e-05	0.000240357	5.99e-07	0.281341	7.75e-06	2512.65	0.281329	5.33397	0.27125	2.61786	0.0103699	2.68347	0.0103699
14BB49-1-26	0.0128135	0.000508	0.00041673	1.32e-05	0.281366	8.24e-06	2542.59	0.281346	6.62639	0.2884	2.5953	0.0110813	2.62778	0.0110813
14BB49-1-27	0.0188315	7.85e-05	0.000707433	5.61e-06	0.281385	7.61e-06	2536.72	0.281351	6.66732	0.26635	2.58909	0.0103143	2.62071	0.0103143
14BB49-1-29	0.00688611	6.39e-05	0.000244505	1.94e-06	0.281359	7.98e-06	2538.89	0.281347	6.58635	0.2793	2.59337	0.0106836	2.62734	0.0106836
14BB49-1-31	0.0125768	0.000154	0.000424485	2.92e-06	0.281381	8.67e-06	2516.36	0.28136	6.5304	0.30345	2.57631	0.011666	2.61323	0.011666
14BB49-1-32	0.0113957	0.000262	0.000393251	6.24e-06	0.281388	8.03e-06	2516.97	0.281369	6.8361	0.28105	2.56523	0.0107983	2.59502	0.0107983
14BB49-1-37	0.0186913	0.000146	0.00058706	3.2e-06	0.281399	7.2e-06	2509.26	0.281371	6.74958	0.252	2.56212	0.00973244	2.59431	0.00973244
14BB49-1-38	0.00677901	6.37e-05	0.000220562	1.38e-06	0.281378	7.09e-06	2528.7	0.281367	7.05899	0.24815	2.56675	0.00949095	2.59052	0.00949095
14BB49-1-41	0.0101183	6.79e-05	0.000390722	2.32e-06	0.281357	8.88e-06	2524.99	0.281338	5.93173	0.3108	2.60633	0.0119313	2.65654	0.0119313
14BB49-1-47	0.0107839	6.73e-05	0.000402438	2.25e-06	0.281387	9.65e-06	2525.61	0.281337	7.01042	0.33775	2.56611	0.0129794	2.59108	0.0129794
14BB49-1-48	0.0142068	0.00016	0.000477081	2.8e-06	0.28137	7.99e-06	2502.16	0.281368	5.72982	0.27965	2.59448	0.0107624	2.65113	0.0107624
14BB49-1-52	0.0088719	0.000121	0.00033883	3.58e-06	0.281385	9.77e-06	2560.8	0.281347	7.84265	0.34195	2.56501	0.0131191	2.56761	0.0131191
14BB49-1-53	0.0281612	0.000313	0.000985525	1.57e-05	0.281393	8.89e-06	2513.27	0.281368	5.92221	0.31115	2.59791	0.0121365	2.64801	0.0121365
14BB49-1-56	0.0132213	0.00025	0.000446627	4.81e-06	0.281369	9.43e-06	2546.29	0.281345	6.76936	0.33005	2.59312	0.0126919	2.62192	0.0126919
14BB49-1-57	0.0133339	0.000203	0.00050691	6.54e-06	0.281371	8.02e-06	2560.8	0.281348	7.0558	0.2807	2.59486	0.0108112	2.61571	0.0108112
14BB49-1-07*	0.00679114	0.000131	0.000240473	3.5e-06	0.281361	8.47e-06	2483.02	0.281346	5.37672	0.29645	2.59069	0.0113389	2.65784	0.0113389
14BB49-1-08*	0.00852139	7.73e-05	0.000294548	1.2e-06	0.281346	6.88e-06	2516.66	0.28135	5.53967	0.2408	2.61372	0.00921966	2.67402	0.00921966
14BB49-1-10*	0.0111998	4.81e-05	0.000392425	1.55e-06	0.281371	8.08e-06	2476.84	0.281332	5.34964	0.2828	2.58683	0.0108609	2.6547	0.0108609
14BB49-1-11*	0.0091715	6.63e-05	0.000317743	1.74e-06	0.281341	7.75e-06	2494.76	0.281353	4.79989	0.27125	2.62278	0.01039	2.7022	0.01039
14BB49-1-15*	0.00906452	0.000213	0.000305631	4.6e-06	0.281368	6.78e-06	2497.84	0.281326	5.85117	0.2373	2.58577	0.00909305	2.64035	0.00909305
14BB49-1-18*	0.00887239	1.47e-05	0.000314134	1.1e-06	0.281368	7.52e-06	2486.73	0.281353	5.59697	0.2632	2.58579	0.0100877	2.64726	0.0100877
14BB49-1-19*	0.00685835	0.000241	0.000257453	9.86e-06	0.281402	9.65e-06	2494.45	0.281353	7.08559	0.33775	2.5362	0.0129373	2.56222	0.0129373
14BB49-1-23*	0.00929489	7.61e-05	0.000325836	3.54e-06	0.281369	8.21e-06	2487.96	0.28139	5.6231	0.28735	2.5859	0.0110165	2.64662	0.0110165
14BB49-1-34*	0.00739642	1.47e-05	0.000246904	1.65e-06	0.281384	7.25e-06	2483.64	0.281353	6.20868	0.25375	2.55991	0.00971305	2.60745	0.00971305
14BB49-1-35*	0.0073074	2.83e-05	0.000277676	9.02e-07	0.281403	7.7e-06	2499.07	0.281373	7.16801	0.2695	2.53712	0.0103286	2.56078	0.0103286
14BB49-1-36*	0.00203397	4.84e-05	9.18507e-05	7.58e-06	0.281411	1.02e-05	2479.62	0.28139	7.33431	0.357	2.51388	0.0136211	2.53545	0.0136211
14BB49-1-40*	0.00733367	4.96e-05	0.000255014	1.08e-06	0.281373	7.26e-06	2479.93	0.281407	5.7082	0.2541	2.57558	0.00972568	2.63517	0.00972568
14BB49-1-42*	0.00751359	2.05e-05	0.000256017	1.29e-06	0.281367	6.79e-06	2479.62	0.281361	5.48971	0.23765	2.58355	0.00909499	2.6483	0.00909499
14BB49-1-43*	0.0065006	3.08e-05	0.000246457	1.06e-06	0.281378	6.71e-06	2502.16	0.281355	6.40614	0.23485	2.56846	0.00898812	2.60978	0.00898812
14BB49-1-45*	0.0194793	0.000106	0.000659407	5.96e-06	0.281369	9.43e-06	2501.54	0.281366	5.36336	0.33005	2.60834	0.0127599	2.67304	0.0127599
14BB49-1-49*	0.0107312	8.16e-05	0.000371471	5.5e-07	0.281351	7.04e-06	2479.62	0.281334	4.73706	0.2464	2.6123	0.00945339	2.6943	0.00945339
